# Supplementary material
Source: HighWire-hosted journal article supplement (http://www.cmajopen.ca/highwire/filestream/80748/field_highwire_adjunct_files/0/open-2013-0016-1-at.pdf)
Supplement: open-2013-0016-1-at.pdf [file open-2013-0016-1-at.pdf]

Appendix 1 (as supplied by the authors): Prevalence of BMI categories in adults 18+ in Canada and Provinces and % Change 2000/-1-2011

| <b>Normal</b>        | <b>NL</b> | <b>PEI</b> | <b>NS</b> | <b>NB</b> | <b>QC</b> | <b>ON</b> | <b>MB</b> | <b>SK</b> | <b>AB</b> | <b>BC</b> | <b>CANADA</b> |
|----------------------|-----------|------------|-----------|-----------|-----------|-----------|-----------|-----------|-----------|-----------|---------------|
| 2000/2001            | 39.0      | 40.5       | 42.1      | 41.9      | 52.4      | 47.9      | 45.5      | 43.0      | 47.6      | 53.8      | 49.0          |
| 2003                 | 37.6      | 38.3       | 41.4      | 41.1      | 49.8      | 47.6      | 42.7      | 40.9      | 46.3      | 53.1      | 47.8          |
| 2005                 | 35.7      | 38.5       | 40.2      | 37.4      | 49.5      | 47.4      | 42.5      | 40.6      | 45.9      | 50.8      | 47.2          |
| 2007/2008            | 34.9      | 38.5       | 38.0      | 38.8      | 48.9      | 45.5      | 43.0      | 39.5      | 44.8      | 52.3      | 46.3          |
| 2009/2010            | 34.3      | 40.8       | 37.9      | 35.4      | 47.3      | 45.1      | 38.6      | 39.5      | 44.1      | 52.0      | 45.5          |
| 2011                 | 29.9      | 41.8       | 37.0      | 38.7      | 47.1      | 45.4      | 40.0      | 39.0      | 45.3      | 51.4      | 45.6          |
| <b>Overweight</b>    |           |            |           |           |           |           |           |           |           |           |               |
| 2000/2001            | 38.2      | 38.9       | 34.9      | 35.0      | 31.9      | 33.6      | 34.7      | 35.0      | 33.9      | 30.7      | 33.1          |
| 2003                 | 40.4      | 38.4       | 35.6      | 36.8      | 33.2      | 34.2      | 36.3      | 36.6      | 35.6      | 31.7      | 34.1          |
| 2005                 | 34.2      | 34.2       | 34.2      | 34.2      | 34.2      | 34.2      | 34.2      | 34.2      | 34.2      | 34.2      | 34.2          |
| 2007/2008            | 38.1      | 36.5       | 37.3      | 38.0      | 32.7      | 34.6      | 35.1      | 34.3      | 34.0      | 31.8      | 33.9          |
| 2009/2010            | 36.5      | 36.0       | 35.2      | 35.2      | 33.9      | 34.1      | 36.1      | 36.4      | 34.7      | 31.3      | 34.0          |
| 2011                 | 41.8      | 34.3       | 37.5      | 34.3      | 33.3      | 33.7      | 36.5      | 37.3      | 33.0      | 31.3      | 33.6          |
| <b>Obese</b>         |           |            |           |           |           |           |           |           |           |           |               |
| 2000/2001            | 21.7      | 19.6       | 21.4      | 21.4      | 12.7      | 15.6      | 18.4      | 20.2      | 16.4      | 12.5      | 15.2          |
| 2003                 | 20.6      | 21.5       | 20.6      | 20.7      | 14.2      | 15.4      | 18.8      | 20.5      | 15.9      | 12.0      | 15.4          |
| 2005                 | 24.5      | 23.0       | 21.3      | 23.1      | 14.5      | 15.5      | 18.5      | 21.2      | 16.2      | 13.4      | 15.8          |
| 2007/2008            | 25.4      | 23.7       | 23.2      | 22.2      | 15.5      | 17.1      | 19.6      | 23.9      | 19.0      | 12.8      | 17.1          |
| 2009/2010            | 28.2      | 21.7       | 25.3      | 27.9      | 16.4      | 18.2      | 23.2      | 22.4      | 19.0      | 13.5      | 18.1          |
| 2011                 | 27.7      | 23.5       | 23.7      | 25.1      | 16.8      | 18.4      | 21.6      | 22.1      | 19.3      | 14.5      | 18.3          |
| <b>Obese Class I</b> |           |            |           |           |           |           |           |           |           |           |               |
| 2000/2001            | 16.1      | 14.7       | 14.7      | 16.0      | 9.5       | 11.5      | 13.0      | 14.4      | 12.2      | 9.3       | 11.3          |
| 2003                 | 15.4      | 15.1       | 14.8      | 14.5      | 10.4      | 11.5      | 13.1      | 14.9      | 11.7      | 9.1       | 11.4          |
| 2005                 | 16.6      | 15.6       | 15.1      | 15.6      | 10.9      | 11.3      | 13.3      | 15.1      | 11.9      | 9.9       | 11.6          |
| 2007/2008            | 18.0      | 16.3       | 15.8      | 15.5      | 11.4      | 12.1      | 13.0      | 16.7      | 13.4      | 9.6       | 12.2          |
| 2009/2010            | 20.5      | 15.2       | 17.0      | 19.3      | 12.0      | 13.1      | 15.7      | 15.6      | 13.4      | 10.2      | 13.0          |
| 2011                 | 20.5      | 18.0       | 15.6      | 16.2      | 13.1      | 12.8      | 15.2      | 15.9      | 13.5      | 10.7      | 13.1          |

|                        | NL  | PEI  | NS   | NB  | QC  | ON  | MB   | SK  | AB  | BC  | CANADA |
|------------------------|-----|------|------|-----|-----|-----|------|-----|-----|-----|--------|
| <b>Obese Class II</b>  |     |      |      |     |     |     |      |     |     |     |        |
| 2000/2001              | 4.1 | 3.3  | 4.8  | 3.7 | 2.4 | 2.9 | 3.8  | 4.3 | 2.9 | 2.2 | 2.8    |
| 2003                   | 3.3 | 4.7  | 4.3  | 3.9 | 2.5 | 2.7 | 4.5  | 4.0 | 3.0 | 2.2 | 2.8    |
| 2005                   | 5.9 | 4.6  | 4.0  | 4.9 | 2.6 | 2.9 | 3.2  | 4.2 | 3.2 | 2.4 | 3.0    |
| 2007/2008              | 4.9 | 5.5  | 4.8  | 4.2 | 3.0 | 3.4 | 4.9  | 4.4 | 4.0 | 2.2 | 3.4    |
| 2009/2010              | 5.6 | 4.0  | 5.7  | 5.7 | 3.0 | 3.6 | 4.9  | 4.6 | 3.7 | 2.3 | 3.5    |
| 2011                   | 4.6 | 3.6  | 5.8  | 6.1 | 2.5 | 4.0 | 4.0  | 4.3 | 4.3 | 2.6 | 3.6    |
| <b>Obese Class III</b> |     |      |      |     |     |     |      |     |     |     |        |
| 2000/2001              | 1.5 | 1.6  | 1.9  | 1.8 | 0.8 | 1.2 | 1.7  | 1.5 | 1.2 | 0.9 | 1.2    |
| 2003                   | 1.9 | 1.8E | 1.5E | 2.3 | 1.3 | 1.2 | 1.2E | 1.6 | 1.2 | 0.7 | 1.2    |
| 2005                   | 2.0 | 2.7E | 2.2  | 2.6 | 0.9 | 1.3 | 1.9  | 1.8 | 1.1 | 1.0 | 1.3    |
| 2007/2008              | 2.6 | 1.9E | 2.6  | 2.5 | 1.2 | 1.9 | 1.7  | 2.8 | 1.6 | 0.9 | 1.5    |
| 2009/2010              | 2.0 | 2.5E | 2.6  | 2.9 | 1.4 | 1.5 | 2.6  | 2.2 | 1.9 | 1.0 | 1.6    |
| 2011                   | 2.6 | 2.5  | 2.3  | 2.8 | 1.2 | 1.7 | 2.4  | 2.0 | 1.4 | 1.2 | 1.6    |

Data Source: Statistics Canada, Canadian Community Health Survey, Share File, 2000/01 (20-64 years), 2003, 2005, 2007-2008, 2009-2010, & 2011 (Prepared by the Newfoundland & Labrador, Centre for Health Information)

E: Data with a coefficient of variation from 16.6%-33.3% are identified with an E and should be interpreted with caution.
